# Supplementary material
Source: publisher figshare collection journal article supplement (https://acs.figshare.com/ndownloader/files/9415987)
Supplement: Supplementary file 1 [file 9415987]

# g-C<sub>3</sub>N<sub>4</sub>/TiO<sub>2</sub> Mesocrystals Composite for H<sub>2</sub> Evolution under Visible Light Irradiation and Its Charge Carriers Dynamics

*Ossama Elbanna, Mamoru Fujitsuka, and Tetsuro Majima<sup>\*</sup>*

<sup>†</sup>The Institute of Scientific and Industrial Research (SANKEN), Osaka University, Mihogaoka  
8-1, Ibaraki, Osaka 567-0047, Japan.

<sup>\*</sup>Author to whom correspondence should be addressed. E-MAIL: majima@sanken.osaka-  
u.ac.jp (T.M.)

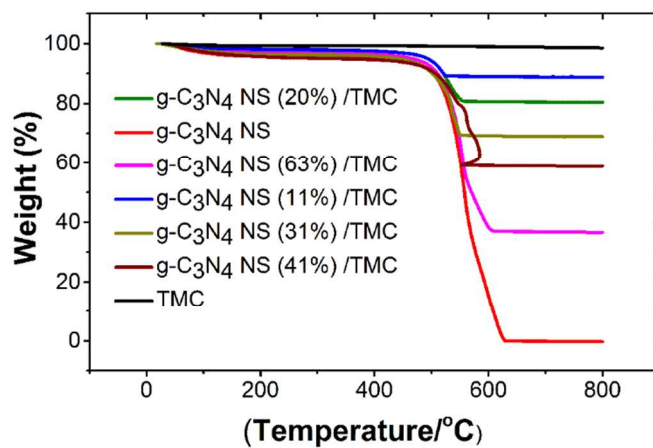

**Figure S1.** TGA curves of pure g-C<sub>3</sub>N<sub>4</sub> NS and g-C<sub>3</sub>N<sub>4</sub> NS/TMC composite with different wt%.

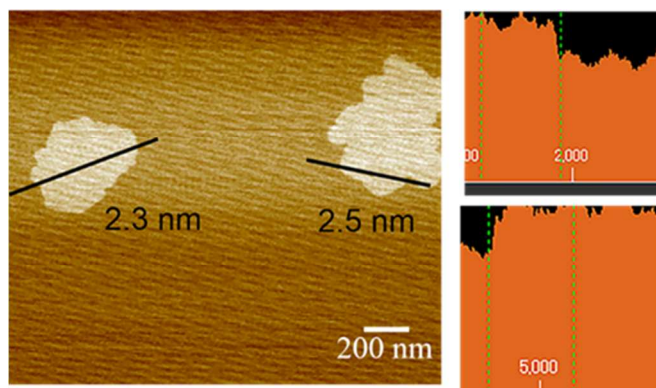

**Figure S2.** AFM image of g-C<sub>3</sub>N<sub>4</sub> NS.

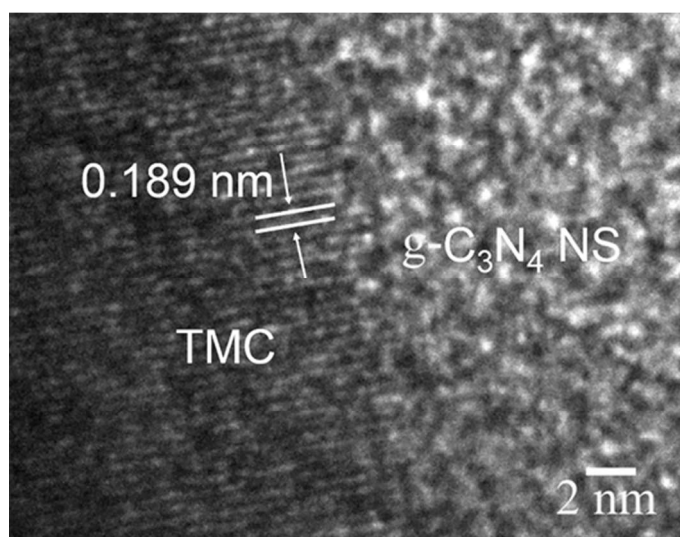

**Figure S3.** HRTEM image of g-C<sub>3</sub>N<sub>4</sub> NS (31 wt%)/TMC.

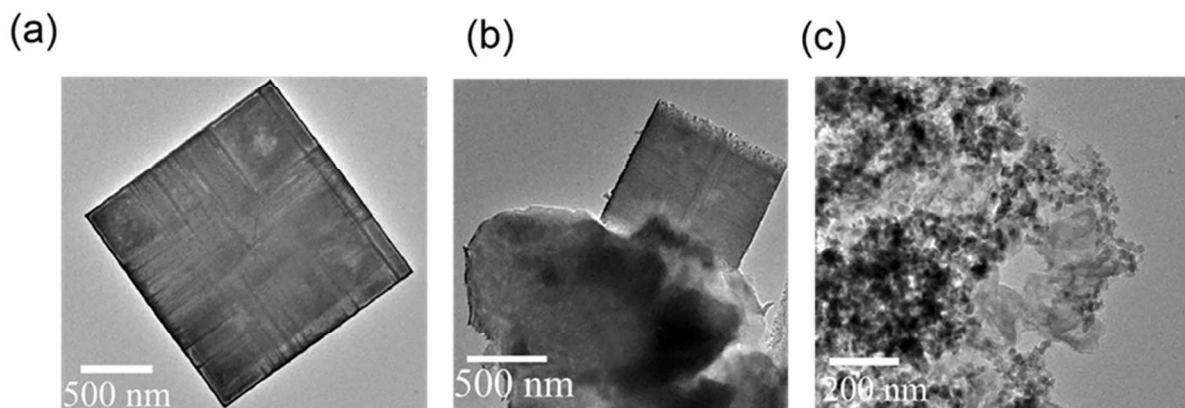

**Figure S4.** TEM images of TMC (a), bulk g-C<sub>3</sub>N<sub>4</sub> (31 wt%)/TMC (b), and g-C<sub>3</sub>N<sub>4</sub> NS (31 wt%) /P25 (c).

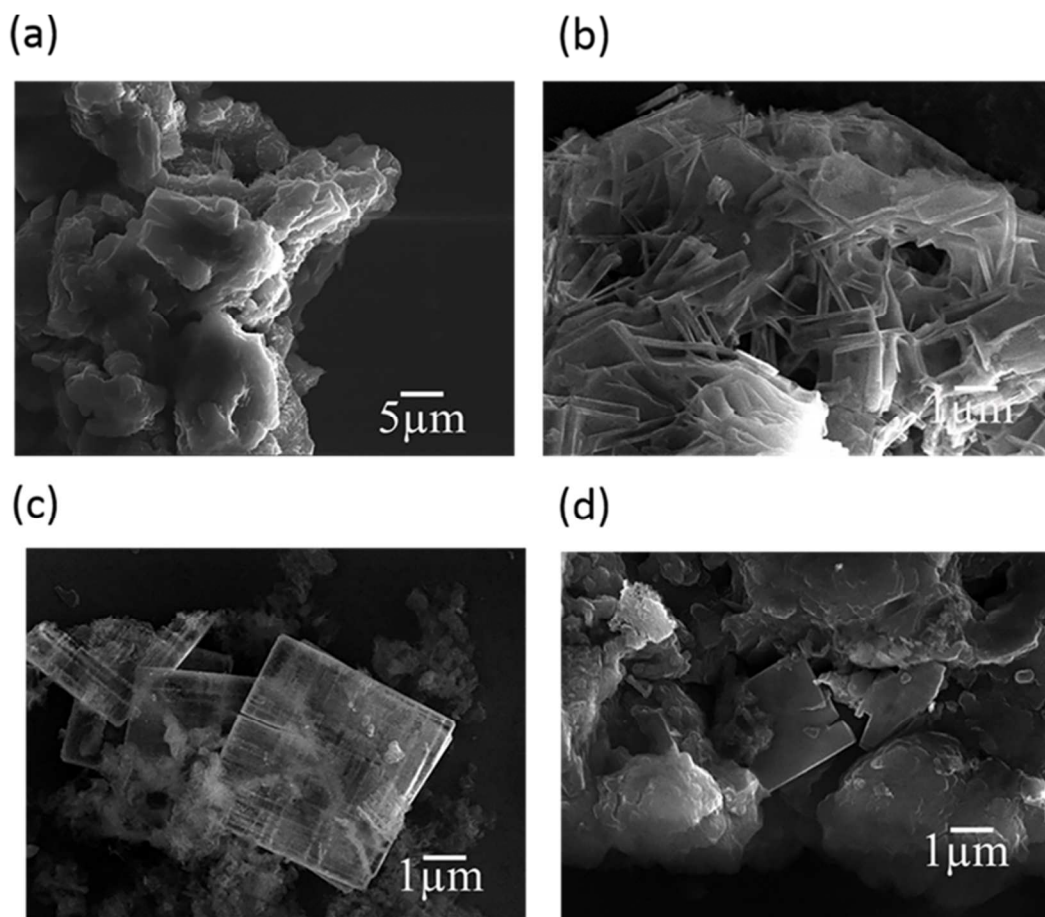

**Figure S5.** SEM images of bulk g-C<sub>3</sub>N<sub>4</sub> (a), g-C<sub>3</sub>N<sub>4</sub> NS (b), g-C<sub>3</sub>N<sub>4</sub> NS (31 wt%)/TMC (c), and bulk g-C<sub>3</sub>N<sub>4</sub> (31 wt%)/TMC (d).

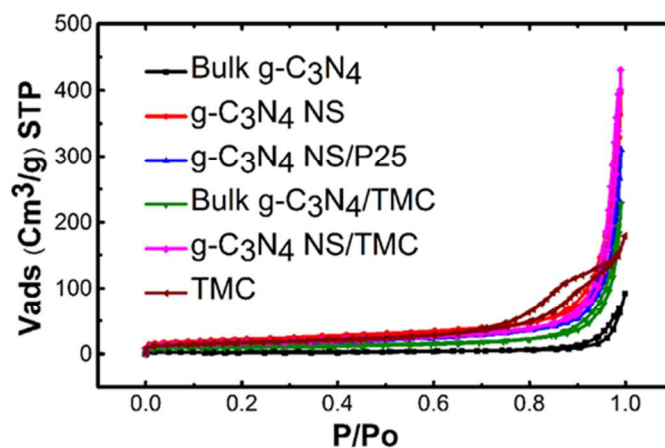

**Figure S6.** N<sub>2</sub> adsorption-desorption isotherm of the prepared samples.

**Mott-Schottky (MS) measurement.** The MS plots were measured with a frequency of 200 Hz and amplitude of 10 mV. The electrodes were immersed in 0.1 M Na<sub>2</sub>SO<sub>4</sub> aqueous solution.

$$1/C_{sc}^2 = [2/e\epsilon_0\epsilon N_d A^2] [(E-E_{fb}) - (K_b T/e)]$$

where  $C_{sc}$  is the space charge capacitance (F cm<sup>-2</sup>),  $A$  is the area,  $N_d$  is the donor density,  $e$  is the elementary charge ( $1.62 \times 10^{-19}$  C),  $\epsilon$  is the relative dielectric constant of the semiconductor,  $\epsilon_0$  is the permittivity of vacuum ( $8.85 \times 10^{-14}$  F cm<sup>-1</sup>),  $E$  is the applied potential (V),  $K_b$  is the Boltzmann constant ( $1.38 \times 10^{-23}$  J K<sup>-1</sup>) and  $T$  is the temperature. According to the equation, three curves can be drawn using  $E$  against  $1/C_{sc}^2$ , and  $E_{fb}$  of the corresponding electrode is ascertained by the x-intercept

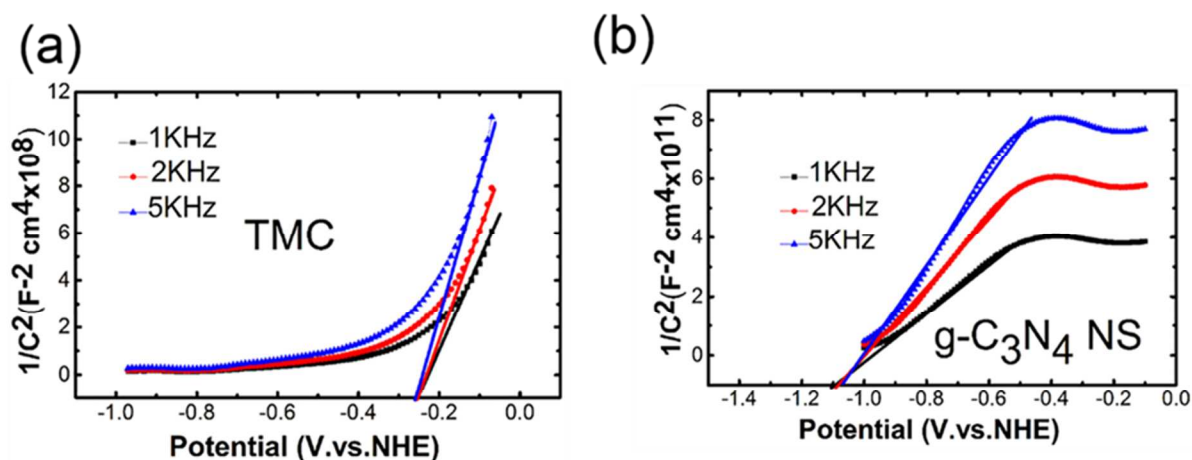

**Figure S7.** Mott-Schottky plot of TMC (a) and g-C<sub>3</sub>N<sub>4</sub> NS (b).

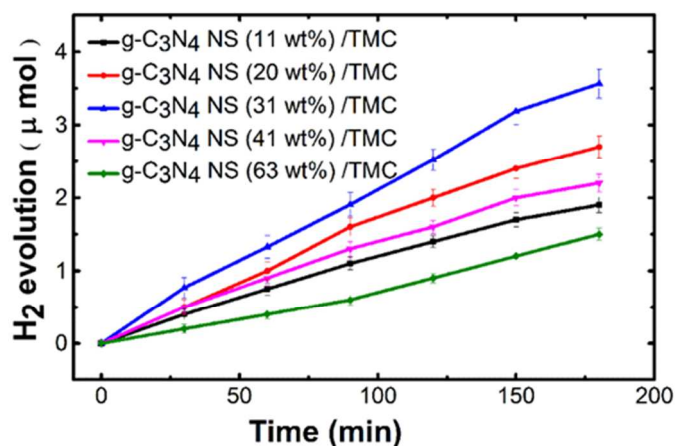

**Figure S8.** Visible-light photocatalytic activities for H<sub>2</sub> evolution ( $\lambda > 420$  nm) of g-C<sub>3</sub>N<sub>4</sub> NS /TMC with different wt% of g-C<sub>3</sub>N<sub>4</sub> NS.

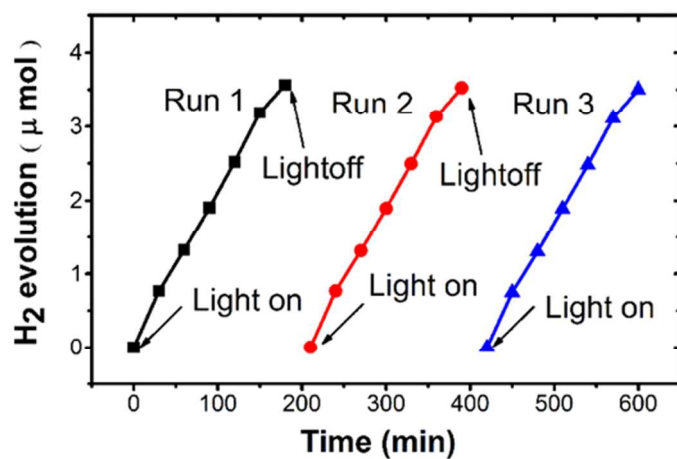

**Figure S9.** Stability test of g-C<sub>3</sub>N<sub>4</sub> NS (31 wt%)/TMC under visible light irradiation ( $\lambda > 420$  nm).

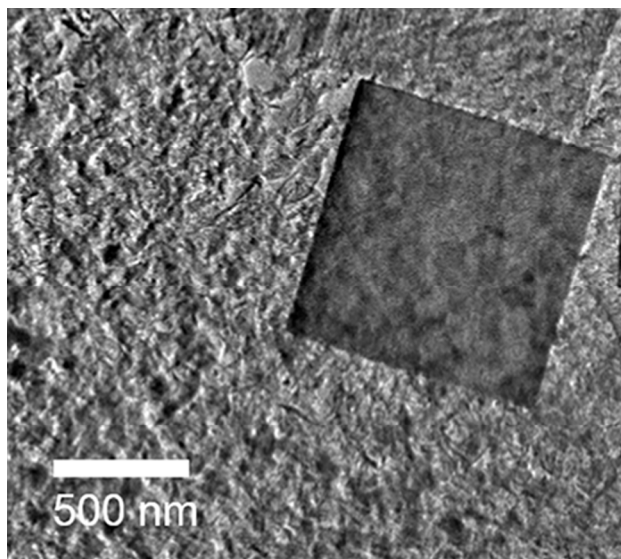

**Figure S10.** TEM image of g-C<sub>3</sub>N<sub>4</sub> NS (31 wt%)/TMC after photocatalytic H<sub>2</sub> evolution under visible light irradiation ( $\lambda > 420$  nm).

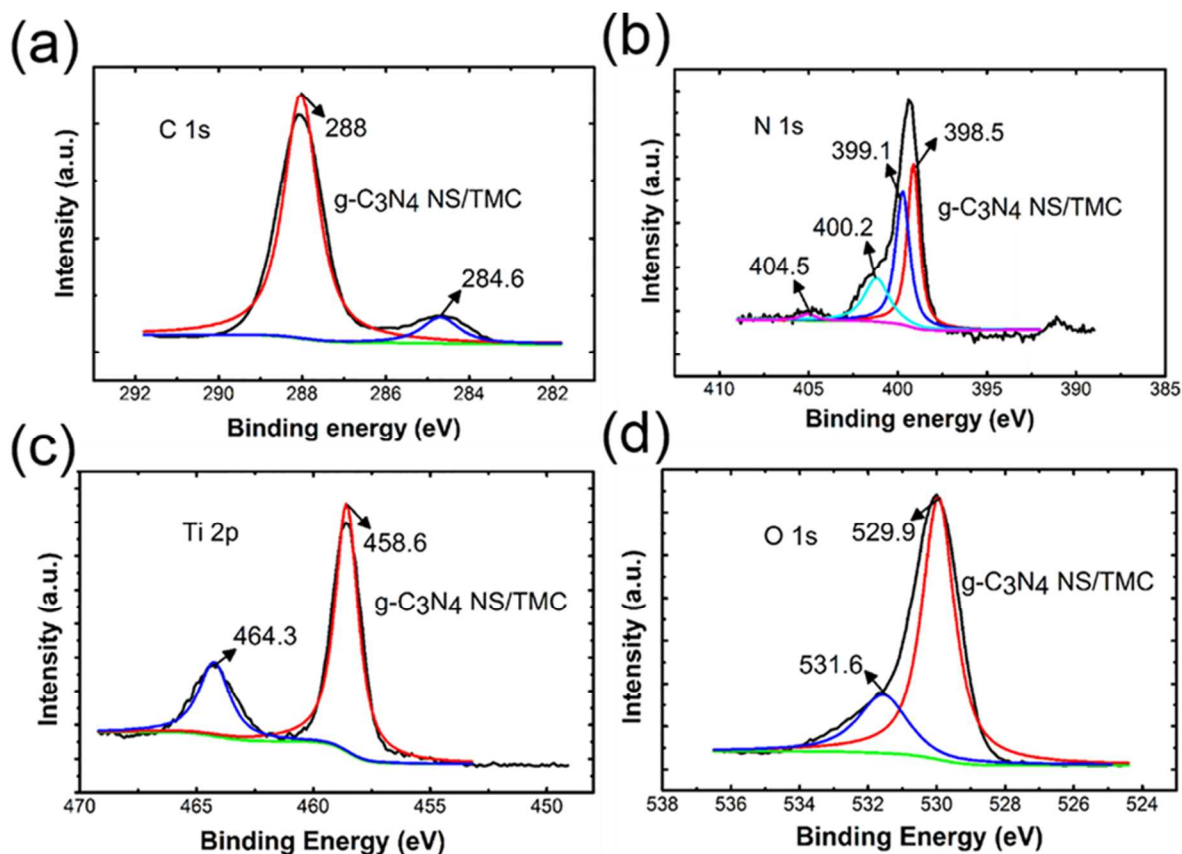

**Figure S11.** High resolution XPS spectra of C 1s (a), N 1s (b), Ti 2p (c), and O 1s (d) of g-C<sub>3</sub>N<sub>4</sub> NS (31 wt%)/TMC after photocatalytic H<sub>2</sub> evolution under visible light irradiation ( $\lambda > 420$  nm).

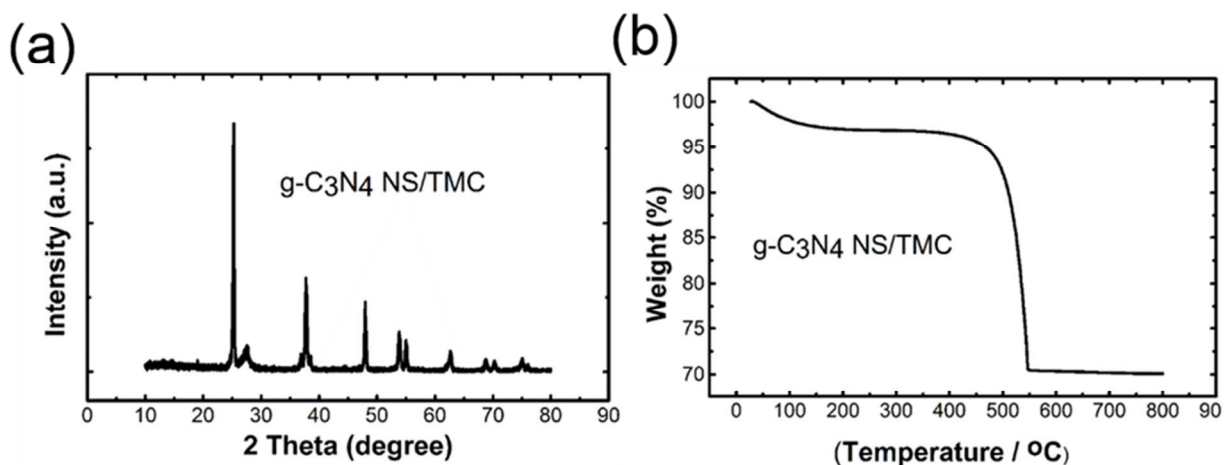

**Figure S12.** (a) XRD and (b) TGA curve of g-C<sub>3</sub>N<sub>4</sub> NS (31 wt%)/TMC after photocatalytic H<sub>2</sub> evolution under visible light irradiation ( $\lambda > 420$  nm).



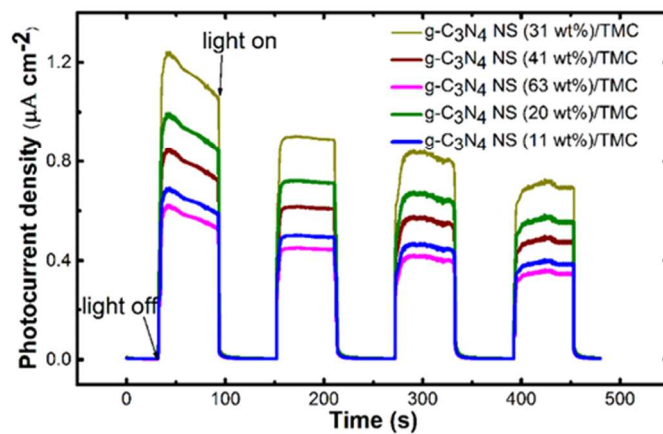

**Figure S13.** Photocurrent response of g-C<sub>3</sub>N<sub>4</sub> NS/TMC with different wt% of g-C<sub>3</sub>N<sub>4</sub> NS.

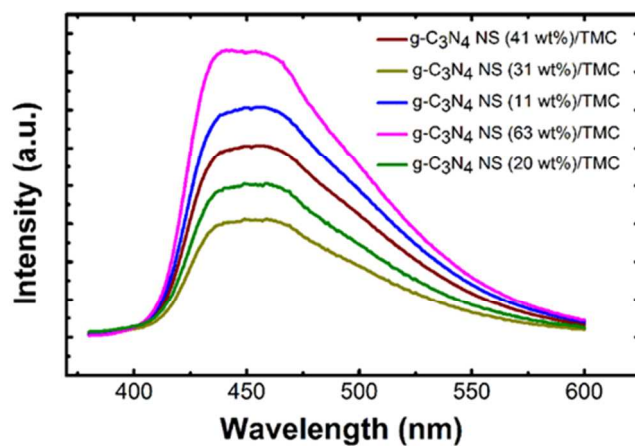

**Figure S14.** Room-temperature PL emission spectra of g-C<sub>3</sub>N<sub>4</sub> NS/TMC with different wt% of g-C<sub>3</sub>N<sub>4</sub> NS.



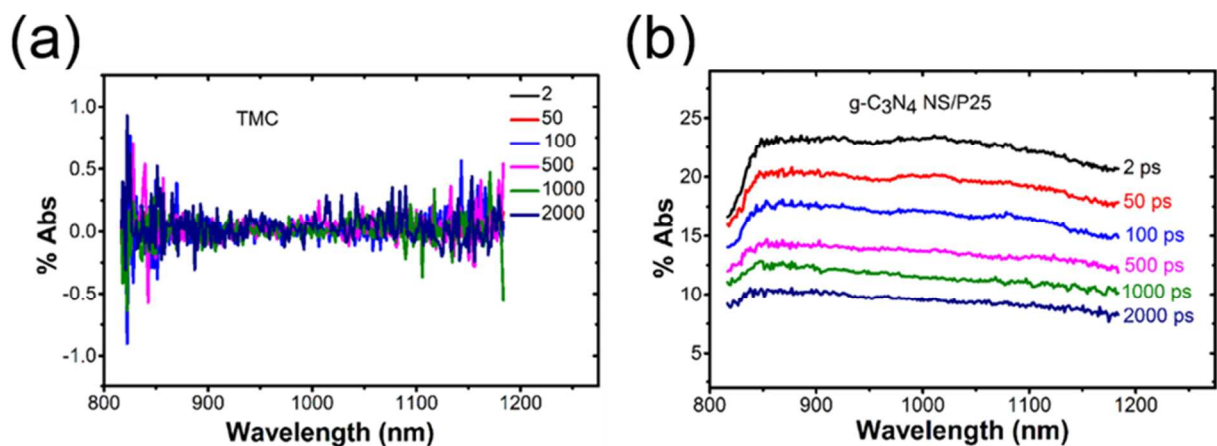

**Figure S15.** Time-resolved diffuse reflectance spectra of TMC (a) and g-C<sub>3</sub>N<sub>4</sub> NS (31 wt%)/P25

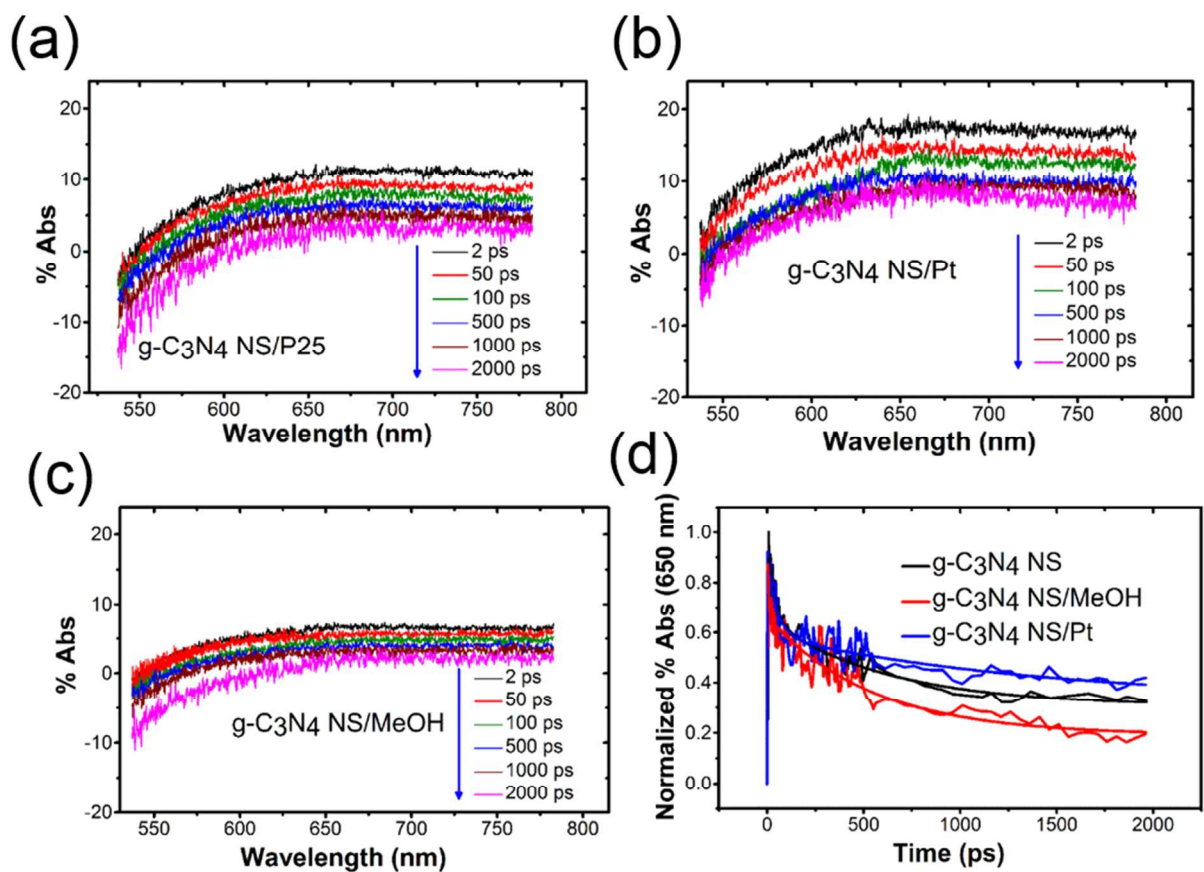

(b).

---

**Figure S16.** Time-resolved diffuse reflectance spectra of g-C<sub>3</sub>N<sub>4</sub> NS (31 wt%)/P25 (a), g-C<sub>3</sub>N<sub>4</sub> NS/Pt (b), g-C<sub>3</sub>N<sub>4</sub> NS/MeOH (c), and time decay profile observed at 650 nm for g-C<sub>3</sub>N<sub>4</sub> NS, g-C<sub>3</sub>N<sub>4</sub> NS/MeOH, and g-C<sub>3</sub>N<sub>4</sub> NS/Pt (d).

**Table S1.** Elemental analysis of g-C<sub>3</sub>N<sub>4</sub> NS and g-C<sub>3</sub>N<sub>4</sub> NS /TMC with different wt%.

| Sample                                          | C%   | N%   | C/N molar ratio |
|-------------------------------------------------|------|------|-----------------|
| g-C <sub>3</sub> N <sub>4</sub> NS              | 35.6 | 62.1 | 0.67            |
| g-C <sub>3</sub> N <sub>4</sub> NS (11 wt%)/TMC | 3.9  | 6.9  | 0.67            |
| g-C <sub>3</sub> N <sub>4</sub> NS (21 wt%)/TMC | 7.2  | 12.7 | 0.66            |
| g-C <sub>3</sub> N <sub>4</sub> NS (31 wt%)/TMC | 11.3 | 19.5 | 0.67            |
| g-C <sub>3</sub> N <sub>4</sub> NS (41 wt%)/TMC | 15   | 26.3 | 0.67            |
| g-C <sub>3</sub> N <sub>4</sub> NS (63 wt%)/TMC | 22.8 | 39.7 | 0.67            |

**Table S2.** The structural characteristics of TMC, g-C<sub>3</sub>N<sub>4</sub>, and g-C<sub>3</sub>N<sub>4</sub>/TMC composite.

| Sample                                            | Surface area (m <sup>2</sup> g <sup>-1</sup> ) | Pore volume (cm <sup>3</sup> g <sup>-1</sup> ) | Pore size (nm) |
|---------------------------------------------------|------------------------------------------------|------------------------------------------------|----------------|
| bulk g-C <sub>3</sub> N <sub>4</sub>              | 8.4                                            | 0.09                                           | 24.3           |
| g-C <sub>3</sub> N <sub>4</sub> NS                | 72.2                                           | 0.55                                           | 14             |
| g-C <sub>3</sub> N <sub>4</sub> NS (31 wt%)/P25   | 52.3                                           | 0.45                                           | 16.5           |
| bulk g-C <sub>3</sub> N <sub>4</sub> (31 wt%)/TMC | 34.2                                           | 0.33                                           | 19             |
| g-C <sub>3</sub> N <sub>4</sub> NS (31 wt%)/TMC   | 57.4                                           | 0.66                                           | 15.5           |

**Table S3.** The fitted parameters of fluorescence lifetime for different samples.

| Samples                                           | A <sub>1</sub> | τ <sub>1</sub> (ns) | A <sub>2</sub> | τ <sub>2</sub> (ns) |
|---------------------------------------------------|----------------|---------------------|----------------|---------------------|
| bulk g-C <sub>3</sub> N <sub>4</sub>              | 0.46           | 0.5                 | 0.54           | 2.2                 |
| g-C <sub>3</sub> N <sub>4</sub> NS                | 0.43           | 0.74                | 0.57           | 3.0                 |
| g-C <sub>3</sub> N <sub>4</sub> NS (31 wt%)/P25   | 0.41           | 0.9                 | 0.59           | 3.3                 |
| bulk g-C <sub>3</sub> N <sub>4</sub> (31 wt%)/TMC | 0.40           | 0.9                 | 0.60           | 3.5                 |
| g-C <sub>3</sub> N <sub>4</sub> NS (31 wt%)/TMC   | 0.35           | 1.1                 | 0.65           | 4.8                 |
